# Supplementary material for: Effects on mental health of a UK welfare reform, Universal Credit: a longitudinal controlled study
Source: PubMed Central journal article supplement (PMC7208537; doi:10.1016/s2468-2667(20)30026-8), 2020-02-27
Supplement: mmc1.pdf [file mmc1.pdf]

# THE LANCET

## Public Health

### **Supplementary appendix**

This appendix formed part of the original submission and has been peer reviewed. We post it as supplied by the authors.

Supplement to: Wickham S, Bentley L, Rose T, Whitehead M, Taylor-Robinson D, Barr B. Effects on mental health of a UK welfare reform, Universal Credit: a longitudinal controlled study. *Lancet Public Health* 2020; **5**: e157–64.

## Table of Contents

|                                                                                                                                                                                                                                                               |           |
|---------------------------------------------------------------------------------------------------------------------------------------------------------------------------------------------------------------------------------------------------------------|-----------|
| <b>Appendix 1. Different patterns of psychological distress as assessed by the General Health Questionnaire-12 (GHQ-12) over the different job definitions in Understanding Society dataset. ....</b>                                                         | <b>1</b>  |
| <b>Appendix 2. Flowchart of study population and sample size. ....</b>                                                                                                                                                                                        | <b>2</b>  |
| <b>Appendix 3. A brief description of Universal Credit and how it has been implemented over time. ....</b>                                                                                                                                                    | <b>3</b>  |
| <i>Figure E1. Timeline of main welfare changes in the UK between 2013 and 2018. ....</i>                                                                                                                                                                      | <i>3</i>  |
| <b>Appendix 4. Description of the difference-in-difference method and equation for multivariable mixed effects linear regression model for psychological distress during a major policy change (introduction of Universal Credit). ....</b>                   | <b>4</b>  |
| <i>Figure E2. Graphical representation of parallel trends assumption in Difference-in-Difference analysis. ....</i>                                                                                                                                           | <i>4</i>  |
| <b>Appendix 5. Full results of parallel trends analysis: Results from the multivariable logistic regression model for psychological distress (GHQ-12) based on analysis of the pre-policy period data to examine for the parallel trends assumption. ....</b> | <b>6</b>  |
| <b>Appendix 6. Full results of main analysis: Results from the multivariable logistic regression model for psychological distress (GHQ-12) based on analysis of 197,111 observations of 52,187 working age individuals ....</b>                               | <b>7</b>  |
| <b>Appendix 7. Robustness tests and additional analysis: Comparison of the parallel trends in psychological distress in the pre-policy period using alternative regression models are shown in the table below. ....</b>                                      | <b>9</b>  |
| <b>References.....</b>                                                                                                                                                                                                                                        | <b>11</b> |

**Appendix 1.** *Different patterns of psychological distress as assessed by the General Health Questionnaire-12 (GHQ-12) over the different job definitions in Understanding Society dataset.*

As seen in this figure, individuals that identified as long-term sick had greater levels of adverse mental health effects prior to the onset of Universal Credit. It has been found that these groups of individuals were affected by other benefit changes to disability benefits which have been shown to have adverse mental health effects during this time and were therefore excluded from the analysis.(1)

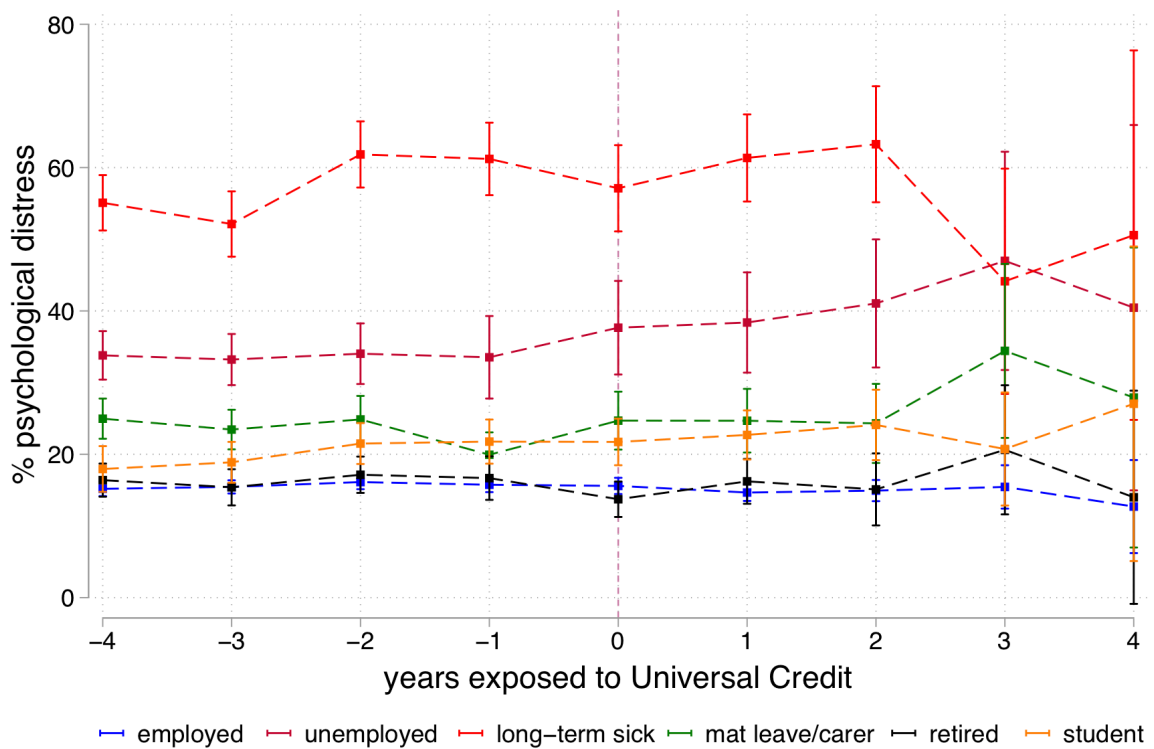

**Appendix 2. Flowchart of study population and sample size.**

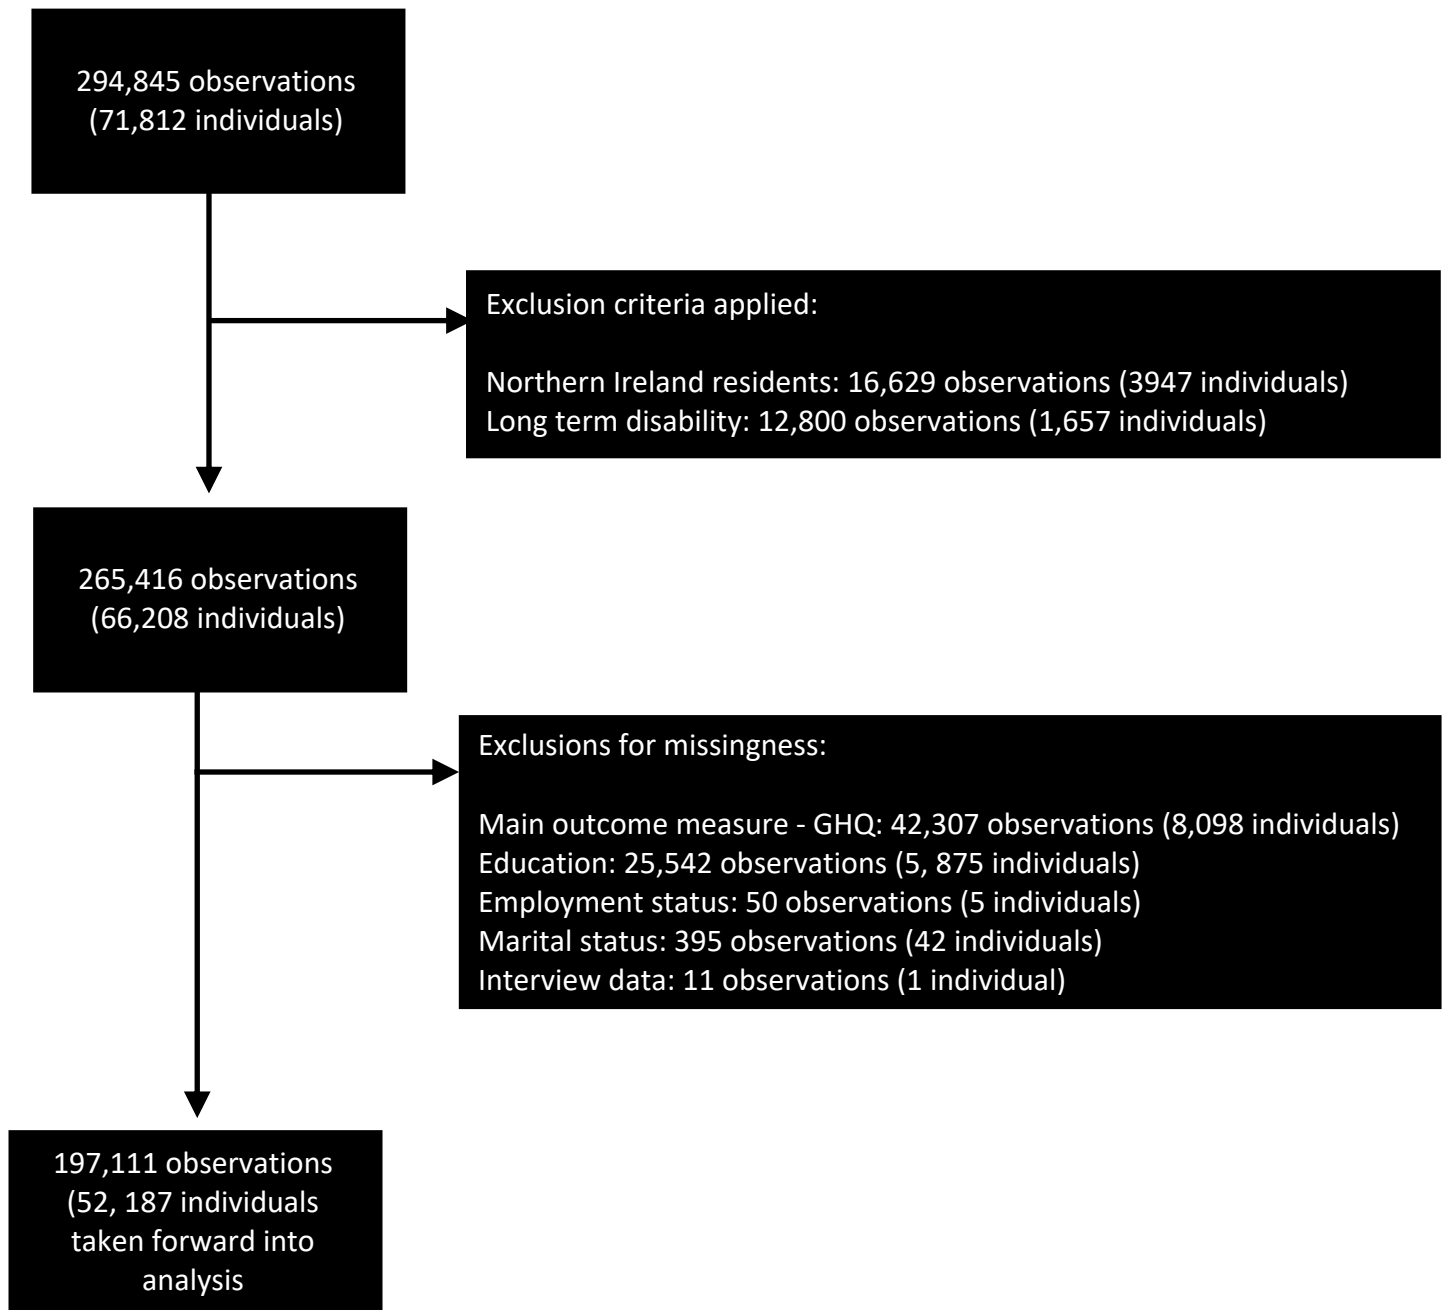

**Appendix 3.** *A brief description of Universal Credit and how it has been implemented over time.*

Universal credit is a means-tested benefit for people of working age who are on low or no income. It replaces six existing means-tested benefits. These include income support, income-based Jobseeker’s Allowance, income-related employment and support allowance, housing benefit, child tax credit and working tax credit. (see figure 1 in main text)

Universal Credit pilots started in a 10 Jobcentres in the North West region of England in 2013 to 2014. In these pilot areas eligibility was restricted to new single then couple jobseekers, then some areas extended eligibility to claimants with children.

National roll-out started in 2015 to only new benefit claims by single jobseekers, all other groups were expected to claim existing benefits. As of September 2018, new claims by all other groups were accepted onto Universal Credit. Individuals who do not have a change in circumstance and are on existing means-tested benefits, were not moved onto Universal Credit until July 2019. Currently those receiving severe disability premium are excluded from claiming Universal Credit.

**In our analysis we have restricted the intervention group to unemployed individuals only, as over the study period they are the most likely to be affected based on the time scale of Universal Credit roll-out and transitions onto Universal Credit.**

The figure below shows how Universal Credit was introduced in the context of other welfare changes over the same time period. As Universal Credit was introduced, it absorbed many of the other welfare changes that occurred at fixed time points (e.g. “bedroom tax”, benefit cap, benefit freeze and two child policy).

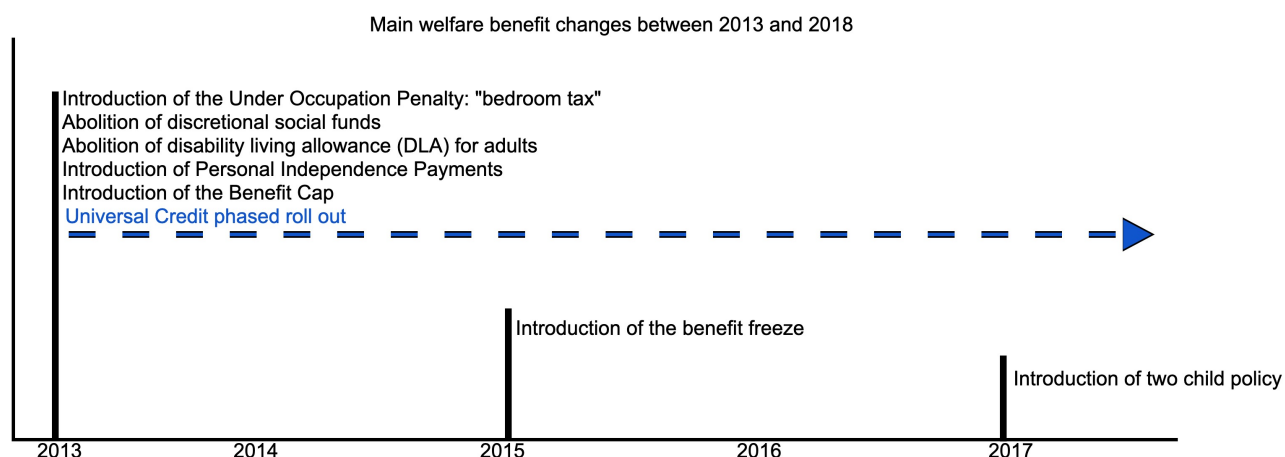

**Figure E1.** Timeline of main welfare changes in the UK between 2013 and 2018.

**Appendix 4.** Description of the difference-in-difference method and equation for multivariable mixed effects linear regression model for psychological distress during a major policy change (introduction of Universal Credit).

Difference-in-difference (DiD) analysis are an established approach used in econometrics (2,3) and are increasingly used in health research (4,5) for evaluating the impact of interventions, where the researcher has not manipulated the assignment of the intervention, sometimes known as “natural experiments”

A key assumption of the DiD method is the parallel trends assumption. That is, in the pre-intervention period the trends in the outcome remain parallel. If the assumption is true, the difference between the change in the outcome between the intervention and the comparison groups provides an unbiased estimate of the interventions effect.

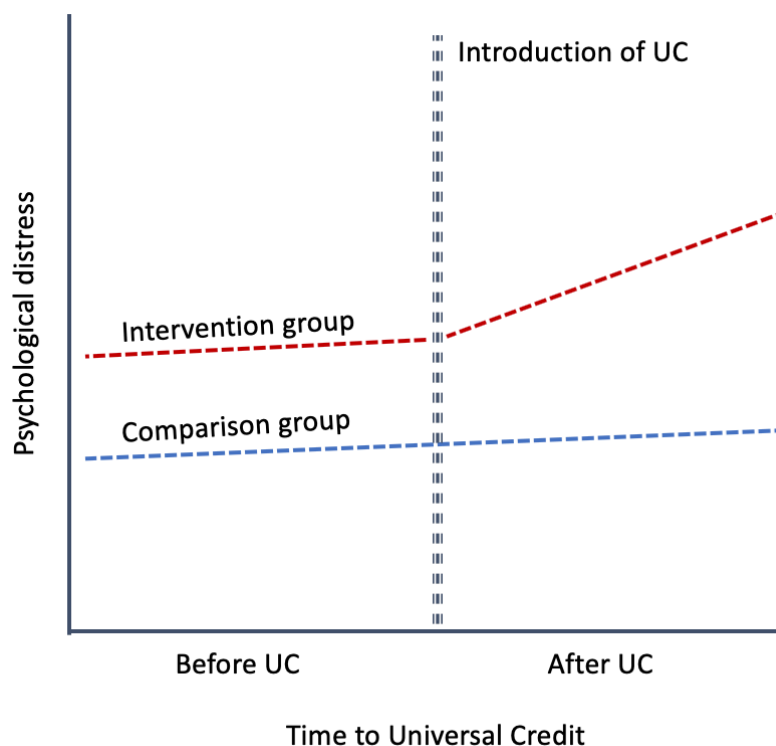

**Figure E2.** Graphical representation of parallel trends assumption in Difference-in-Difference analysis.

To test the parallel trends assumption has not been violated we can observe it graphically and with a regression model in the pre-intervention period only (Before UC was introduced). If the interaction term between the treatment group (intervention versus comparison) and Period (pre-policy period) are non-significant then we can assume they are parallel, and the assumption has not been violated. Therefore, DiD is appropriate.

The equation for the DiD in our main analysis is described below:

$$\ln\left(\frac{P}{1-P}\right) = \beta_0 + \beta_1 \text{Country}_{ij} + \beta_2 \text{Time}_{ij} + \beta_3 \text{Age}_i + \beta_4 \text{Age}^2_{ij} + \beta_5 \text{Sex}_{ij} + \beta_6 \text{Marital Status}_{ij} + \beta_7 \text{Education}_{ij} + \beta_8 \text{Treatment}_{ij} + \beta_9 \text{Period}_{ij} + \beta_{10} \text{Treatment}_{ij} * \text{Period}_{ij} + \varepsilon_{ij}$$

Where  $\ln\left(\frac{P}{1-P}\right)$  is psychological distress (scored by GHQ-12) for individual  $i$  in year  $j$ . The intercept  $\beta_{0j}$  contains a random effect term and thus varies across years. *Country* represents the place people live in (England = 1, Scotland = 2, Wales = 3); *Time* represents the number of months exposed to Universal Credit; *Age* is the working age of participants (continuous measure from 16-64 years of age); we included age squared was also included in the model as this has a non-linear relationship with psychological distress; *Sex* is sex of participants (male = 1, female = 2); *Marital Status* is the marital status of participants (married = 0, unmarried = 1), *Education* is the highest educational attainment (degree or equivalent = 0, GCSE - A-levels or equivalent = 1, No or other qualification = 2); *Treatment* is a dummy variable indicating eligibility to receive the intervention (Comparison group = 0, Unemployed = 1); *Period* indicates whether year  $j$  occurs post or pre-intervention (post-intervention = 1; pre-intervention = 0); *Treatment\*Period* is the DiD estimator; and  $\varepsilon$  is the error term.

**Appendix 5.** Full results of parallel trends analysis: Results from the multivariable logistic regression model for psychological distress (GHQ-12) based on analysis of the pre-policy period data to examine for the parallel trends assumption.

| Mental health effect                         | OR     | Std Error | t       | P value | Lower 95%CI | Upper 95% CI |
|----------------------------------------------|--------|-----------|---------|---------|-------------|--------------|
| Age                                          | 0.006  | 0.001     | 8.030   | <0.0001 | 0.005       | 0.008        |
| Age squared                                  | -0.000 | 0.000     | -7.910  | <0.0001 | -0.000      | -0.000       |
| Country                                      |        |           |         |         |             |              |
| Scotland                                     | -0.011 | 0.007     | -1.570  | 0.117   | -0.025      | 0.003        |
| Wales                                        | -0.010 | 0.007     | -1.380  | 0.166   | -0.025      | 0.004        |
| Unmarried                                    | -0.050 | 0.004     | -11.950 | <0.0001 | -0.059      | -0.042       |
| Sex                                          |        |           |         |         |             |              |
| female                                       | 0.066  | 0.003     | 20.070  | <0.0001 | 0.059       | 0.072        |
| Education                                    |        |           |         |         |             |              |
| GCSE-A levels                                | 0.001  | 0.004     | 0.200   | 0.842   | -0.007      | 0.009        |
| Other/No qual                                | 0.005  | 0.005     | 0.990   | 0.320   | -0.005      | 0.015        |
| Unemployment                                 |        |           |         |         |             |              |
| Year to UC                                   | 0.182  | 0.024     | 7.710   | <0.0001 | 0.136       | 0.228        |
|                                              | 0.003  | 0.001     | 2.500   | 0.012   | 0.001       | 0.005        |
| Treatment#Time                               |        |           |         |         |             |              |
| Unemployed#months before policy introduction | 0.008  | 0.006     | 1.380   | 0.168   | -0.003      | 0.019        |
| cons                                         | 0.052  | 0.015     | 3.550   | <0.0001 | 0.024       | 0.081        |



**Appendix 6.** Full results of main analysis: Results from the multivariable logistic regression model for psychological distress (GHQ-12) based on analysis of 197,111 observations of 52,187 working age individuals

| Mental health diff | OR    | Linearized |         | P value | Lower 95%CI | Upper 95% CI |
|--------------------|-------|------------|---------|---------|-------------|--------------|
|                    |       | Std Error  | t       |         |             |              |
| Year of UC         | 1.018 | 0.007      | 2.610   | 0.009   | 1.005       | 1.032        |
| Age                | 1.038 | 0.005      | 7.900   | <0.0001 | 1.028       | 1.048        |
| Age squared        | 1.000 | 0.000      | -7.670  | <0.0001 | 0.999       | 1.000        |
| Country            |       |            |         |         |             |              |
| Scotland           | 0.905 | 0.042      | -2.170  | 0.030   | 0.827       | 0.990        |
| Wales              | 0.982 | 0.047      | -0.390  | 0.698   | 0.894       | 1.078        |
| Unmarried          | 0.677 | 0.016      | -16.230 | <0.0001 | 0.646       | 0.710        |
| Sex                |       |            |         |         |             |              |
| Female             | 1.619 | 0.035      | 22.390  | <0.0001 | 1.552       | 1.689        |
| Education          |       |            |         |         |             |              |
| GCSE-Alevels       | 1.032 | 0.027      | 1.230   | 0.218   | 0.981       | 1.086        |
| Other/No qual      | 1.052 | 0.035      | 1.540   | 0.124   | 0.986       | 1.123        |
| Unemployed         | 2.381 | 0.100      | 20.650  | <0.0001 | 2.193       | 2.585        |
| Post Intervention  | 0.934 | 0.038      | -1.660  | 0.097   | 0.862       | 1.012        |
| Treatment#Period   |       |            |         |         |             |              |
| Unemployed#Post    | 1.382 | 0.153      | 2.920   | 0.003   | 1.112       | 1.718        |
| _cons              | 0.095 | 0.009      | -25.280 | <0.0001 | 0.079       | 0.114        |

**Marginal test**

|                                    | DiD estimator | Std Err | t     | P value | Lower 95%CI | Upper 95% CI |
|------------------------------------|---------------|---------|-------|---------|-------------|--------------|
| Treatment#Period (1 vs 0) (1 vs 0) | 0.066         | 0.025   | 2.640 | 0.008   | 0.017       | 0.114        |

The number of new claims for UC amongst unemployed people between April 2013 and December 2018 was 1,020,351 (source DWP statistics).(6) Based on our estimate that going onto UC increased the prevalence of psychological distress of 6.6 percentage points (based on marginal analysis above, we estimate that and additional 6.6% of these people developed psychological distress than would have been the case in the absence of UC. This provides the estimate of an additional 6.6% x 1,020,351= 63,674. Therefore roughly 64,000 people have experienced psychological distress as a result of the policy introduction [ 95% CI 10,042 to 117,307].

Note the number of new claims for UC amongst unemployed people between April 2013 and December 2018 data takes the number of people on Universal Credit relative to the second Thursday of each month with the count of the number of UC claims at the end of each quarter that have a duration of under three months to approximate the number of new starts to UC. It

is possible that these data may both underestimate and overestimate the true count as they as won't count people who started then stopped before the end of the quarter, but they may also overestimate due to the possibility that some people may make repeat claims.

**Appendix 7. Robustness tests and additional analysis: Comparison of the parallel trends in psychological distress in the pre-policy period using alternative regression models are shown in the table below.**

*Note for model 5:* Imputations of 10 datasets were performed using the analytical models in Stata 14 (command: mi estimate). All variables included in the main analysis were included in the imputation process. The multiple imputation of the 10 datasets adjusts coefficients and standard errors for the variability between imputations according to the combination rules set by Rubin (1987). (7)

| Alternative specifications models <sup>1</sup>                                                 | Coefficient (95% CIs) | Lower 95% CI | Upper 95% CI | p-value |
|------------------------------------------------------------------------------------------------|-----------------------|--------------|--------------|---------|
| 1 Linear probability regression model                                                          | 0.008                 | -0.003       | 0.019        | 0.163   |
| 2 Removing employed people from comparison sample                                              | 0.005                 | -0.007       | 0.017        | 0.385   |
| 3 Restricting analysis to those with only new onset of unemployment and psychological distress | -0.005                | -0.039       | 0.029        | 0.767   |
| 4 Using a balanced panel                                                                       | 0.005                 | -0.014       | 0.025        | 0.591   |
| 5 Using multiple Imputations*                                                                  | 0.026                 | -0.028       | 0.080        | 0.346   |

*Comparing difference-in-difference estimator using alternative regression models are shown in the table below.*

| Alternative specifications models <sup>1</sup>                                                 | OR (95% CIs)      | Percentage point change in prevalence of psychological distress | Lower 95% CI | Upper 95% CI | p-value |
|------------------------------------------------------------------------------------------------|-------------------|-----------------------------------------------------------------|--------------|--------------|---------|
| 1 Linear probability regression model                                                          | -                 | 7.71%                                                           | 3.75         | 12.66        | 0.002   |
| 2 Removing employed people from comparison sample                                              | 1.25 (0.10, 1.58) | 4.32%                                                           | -0.57        | 9.21         | 0.080   |
| 3 Restricting analysis to those with only new onset of unemployment and psychological distress | 1.73 (1.01,2.95)  | 12.15%                                                          | -0.39        | 24.68        | 0.058   |
| 4 Using a balanced panel                                                                       | 1.53 (1.17,2.01)  | 10.25%                                                          | 3.00%        | 15.49%       | 0.004   |
| 5 Using Multiple Imputations                                                                   | 1.38 (1.22,1.73)  | 6.5%                                                            | 1.61         | 11.33        | 0.009   |

<sup>1</sup>Each model controlled for age, age squared, sex, education, country, and marital status.

To investigate whether there were differential effects across subgroups within the main model we tested the interaction of age with the intervention by period interaction term. We repeated this for sex and education in three separate logistic regression models. Results are in the table below

|   | Interaction measures                       | OR                     | Lower 95% CI | Upper 95% CI | P value |
|---|--------------------------------------------|------------------------|--------------|--------------|---------|
| 1 | Age# treatment # policy interaction        | 16-24                  | -            | -            | -       |
|   |                                            | 25-44                  | 0.97         | 0.55         | 1.73    |
|   |                                            | 45-54                  | 0.82         | 0.47         | 1.43    |
|   |                                            | 55-64                  | 0.55         | 0.26         | 1.16    |
| 2 | Sex # treatment # policy interaction       | Male                   | -            | -            | -       |
|   |                                            | Female                 | 1.11         | 0.73         | 1.70    |
| 3 | Education # treatment # policy interaction | Degree or higher       | -            | -            | -       |
|   |                                            | GCSE/A-levels or equiv | 1.29         | 0.75         | 2.24    |
|   |                                            | Below GCSE/other       | 1.03         | 0.58         | 1.85    |

### **Additional analysis not described in main text**

Replacing Country covariate with Region:

| highq                    | Odds Ratio | Std Error | t       | P- value | Lower 95% CI | Upper 95% CI |
|--------------------------|------------|-----------|---------|----------|--------------|--------------|
| Year of UC               | 1.021      | 0.007     | 3.010   | 0.003    | 1.007        | 1.035        |
| Age                      | 1.037      | 0.005     | 7.700   | <0.0001  | 1.027        | 1.046        |
| Age squared              | 1.000      | 0.000     | -7.480  | 0.000    | 0.999        | 1.000        |
| GOR                      |            |           |         |          |              |              |
| Wales                    | 0.903      | 0.145     | -0.640  | 0.525    | 0.659        | 1.237        |
| Scotland                 | 0.980      | 0.158     | -0.120  | 0.902    | 0.715        | 1.344        |
| East Midlands            | 0.979      | 0.157     | -0.130  | 0.894    | 0.714        | 1.342        |
| East of England          | 0.915      | 0.143     | -0.570  | 0.570    | 0.673        | 1.244        |
| London                   | 0.928      | 0.147     | -0.470  | 0.638    | 0.681        | 1.266        |
| North East               | 1.000      | 0.157     | 0.000   | 0.998    | 0.735        | 1.362        |
| North West               | 1.025      | 0.162     | 0.160   | 0.875    | 0.753        | 1.396        |
| South East               | 1.004      | 0.158     | 0.030   | 0.978    | 0.738        | 1.367        |
| South West               | 1.102      | 0.176     | 0.610   | 0.541    | 0.806        | 1.507        |
| West Midlands            | 1.024      | 0.160     | 0.150   | 0.878    | 0.754        | 1.392        |
| Yorkshire and the Humber | 0.954      | 0.150     | -0.300  | 0.764    | 0.701        | 1.298        |
| Unmarried                | 0.678      | 0.016     | -16.320 | <0.0001  | 0.647        | 0.711        |
| Sex                      |            |           |         |          |              |              |
| Female                   | 1.613      | 0.035     | 22.280  | <0.0001  | 1.547        | 1.683        |
| Education                |            |           |         |          |              |              |
| GCSE-A levels            | 1.045      | 0.027     | 1.720   | 0.085    | 0.994        | 1.098        |
| Other/No qual            | 1.066      | 0.035     | 1.930   | 0.054    | 0.999        | 1.137        |
| Unemployed               | 2.383      | 0.100     | 20.620  | <0.0001  | 2.194        | 2.588        |
| Post Intervention        | 0.931      | 0.038     | -1.750  | 0.080    | 0.859        | 1.009        |
| Treatment#Period         |            |           |         |          |              |              |
| Unemployed#Post          | 1.383      | 0.153     | 2.930   | 0.003    | 1.113        | 1.717        |
| _cons                    | 0.097      | 0.017     | -13.080 | <0.0001  | 0.069        | 0.138        |

---

## References

1. Barr B, Taylor-Robinson D, Stuckler D, Loopstra R, Reeves A, Whitehead M. ‘First, do no harm’: are disability assessments associated with adverse trends in mental health? A longitudinal ecological study. *Journal of Epidemiology and Community Health*. 2015;70(4):jech-2015-206209.
2. Angrist JD, Pischke J-S. *Mostly Harmless Econometrics: An Empiricist’s Companion*. Princeton: Princeton University Press 2009.
3. Wooldridge JM. *Econometric Analysis of Cross Section and Panel Data*. 2nd Revised ed. Cambridge: Mass: MIT Press 2010.
4. Craig P, Dieppe P, Macintyre S, et al. Developing and evaluating complex interventions: the new Medical Research Council guidance. *BMJ* 2008;337:a1655. doi: 10.1136/bmj.a1655 [published Online First: 2008/10/01]
5. Craig P, Katikireddi SV, Leyland A, et al. Natural Experiments: An Overview of Methods, Approaches, and Contributions to Public Health Intervention Research. *Annu Rev Public Health* 2017;38:39-56. doi: 10.1146/annurev-publhealth-031816-044327 [published Online First: 2017/01/27]
6. Department for Work and Pensions. Stat-Xplore. <https://stat-xplore.dwp.gov.uk/> Department for Work and Pensions. 2019.
7. Rubin, D. B. 1987. *Multiple Imputation for Nonresponse in Surveys*. New York: Wiley.
